# Supplementary material
Source: PubMed Central journal article supplement (PMC10885009)
Supplement: aem.01654-23-s0002.pdf [file aem.01654-23-s0002.pdf]

**Supplementary Dataset 2:** Available in Figshare via <https://doi.org/10.6084/m9.figshare.24654024>
