# Supplementary material
Source: PubMed Central journal article supplement (PMC10885009)
Supplement: aem.01654-23-s0003.pdf [file aem.01654-23-s0003.pdf]

**Supplementary Table 1** Minimal Inhibitory concentrations of *Acinetobacter* strains <sup>a</sup>

| Species/Strain | Cefotaxime | Ceftazidime | Meropenem | Imipenem | Amikacin | Kanamycin | Gentamicin | Colistin |
|----------------|------------|-------------|-----------|----------|----------|-----------|------------|----------|
| SAAb472        | 12         | 2           | 0.25      | 0.125    | 3        | 3         | 0.38       | 0.75     |
| SAAg309        | 12         | 2           | 0.25      | 0.75     | 4        | 3         | 16         | 4        |
| SAAt364        | 32         | 256         | 8         | 8        | 2        | 3         | 0.5        | 256      |
| SAAt401        | 4          | 2           | 0.25      | 0.125    | 4        | 3         | 0.75       | 1        |
| SAAt388        | 8          | 256         | 0.25      | 2        | 3        | 4         | 0.5        | 256      |
| SAAAs470       | 8          | 1.5         | 0.25      | 0.125    | 4        | 4         | 0.5        | 1        |
| SAAAs474       | 3          | 3           | 0.125     | 0.047    | 0.5      | 0.5       | 0.094      | 0.25     |
| SAAj643        | 12         | 2           | 1         | 0.25     | 0.25     | 0.094     | 0.064      | 0.5      |
| SAAc573        | 32         | 256         | 0.19      | 0.125    | 1.5      | 2         | 0.25       | 256      |
| SAAc652        | 32         | 256         | 0.38      | 0.25     | 1.5      | 4         | 0.5        | 256      |

<sup>a</sup> numbers indicate mg/L.
