# Supplementary material
Source: PubMed Central journal article supplement (PMC10885009)
Supplement: aem.01654-23-s0005.pdf [file aem.01654-23-s0005.pdf]

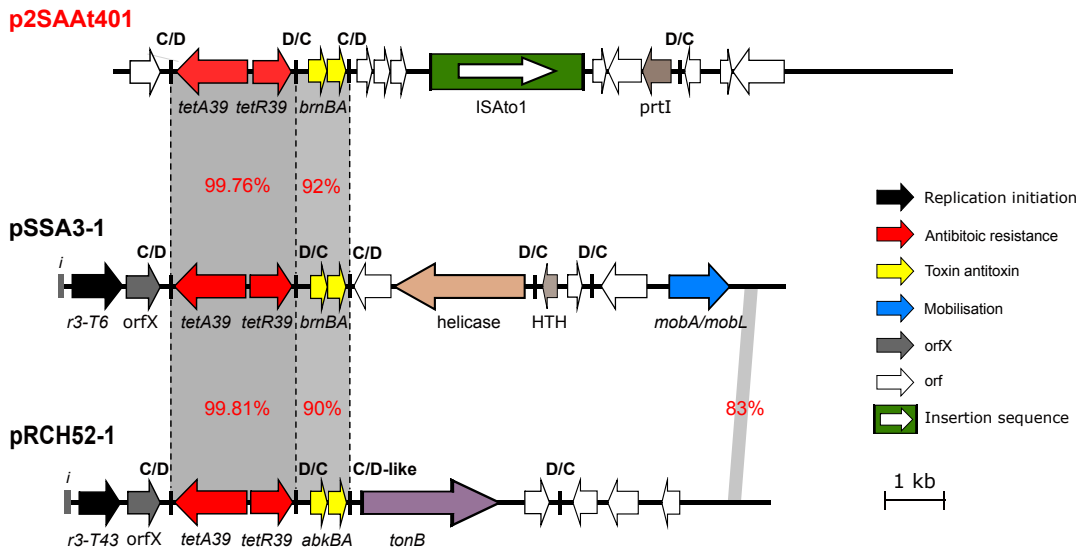

**Supplementary FIG 2** Genetic structure of p2SAAt401 compared to pSSA3-1 and pRCH52-1. Filled arrows indicate the orientation and extent of genes. Resistance genes are coloured red, and the filled box coloured green indicate ISAto1. Black arrows are putative replication initiation genes and toxin/anti toxin genes are yellow. Vertical black lines indicate *pdif* sites. Scale bar is shown.
